# Supplementary material for: Low-Carbohydrate, High-Protein, High-Fat Diets Rich in Livestock, Poultry and Their Products Predict Impending Risk of Type 2 Diabetes in Chinese Individuals that Exceed Their Calculated Caloric Requirement
Source: MDPI journal article supplement (doi:10.3390/nu10010077), 2018-01-12
Supplement: s1 [file s1]

**Table S1** Pearson's correlations between livestock, poultry, egg and their products and relevant nutrients in the Harbin People's Health Study (Cohort 1, 2008-2012) and Harbin Cohort Study on Diet, Nutrition and Chronic Non-communicable Diseases (Cohort 2, 2010-2015)

| Nutrients                  | Foods     |         |         |
|----------------------------|-----------|---------|---------|
|                            | Livestock | Poultry | Egg     |
| <b>Cohort 1</b>            |           |         |         |
| Protein                    | 0.320**   | 0.381** | 0.326** |
| Fat                        | 0.786**   | 0.437** | 0.288** |
| Saturated fatty acid       | 0.849**   | 0.474** | 0.342** |
| Monounsaturated fatty acid | 0.853**   | 0.521** | 0.255** |
| Cholesterol                | 0.261**   | 0.362** | 0.919** |
| <b>Cohort 2</b>            |           |         |         |
| Protein                    | 0.407**   | 0.424** | 0.352** |
| Fat                        | 0.784**   | 0.508** | 0.309** |
| Saturated fatty acid       | 0.849**   | 0.535** | 0.366** |
| Monounsaturated fatty acid | 0.857**   | 0.565** | 0.276** |
| Cholesterol                | 0.266**   | 0.346** | 0.942** |

\*\* All displayed correlations were significant at  $P < 0.01$ .

**Table S2** Selected baseline food intake of the Harbin People's Health Study (Cohort 1, 2008-2012) and Harbin Cohort Study on Diet, Nutrition and Chronic Non-communicable Diseases (Cohort 2, 2010-2015)

| Food items(g/day) | Cohort 1 | Cohort 2 |
|-------------------|----------|----------|
| Livestock         | 61±62    | 67±66    |
| Poultry           | 20±32    | 25±34    |
| Vegetable         | 286±219  | 271±219  |

Mean ± Standard Deviation were used for continuous variables.
